# Supplementary material for: Natural arbovirus infection rate and detectability of indoor female Aedes aegypti from Mérida, Yucatán, Mexico
Source: PubMed Central journal article supplement (PMC7781390; doi:10.1371/journal.pntd.0008972), 2021-01-04

# PLOS Neglected Tropical Diseases

## Natural Arbovirus Infection Rate and Detectability of Indoor Female *Aedes aegypti* from Merida, Yucatan, Mexico. --Manuscript Draft--

|                                                                                                                                                                                                                                                                                                                                     |                                                                                                                                                                                                                                                                                                                                                                                                                                                                                                                                                                                                                                                                                                                                                                                                                                                                                                                                                                                                                                                                                                                                                                                                                                                                                                                                                                                                                                                                                                                                                                                                                                                                                                                                                                                                                                                                                                                                                                                                                                                                                                                                                                                                                                                                                                                                                                                                                                                                                                                                                                                           |
|-------------------------------------------------------------------------------------------------------------------------------------------------------------------------------------------------------------------------------------------------------------------------------------------------------------------------------------|-------------------------------------------------------------------------------------------------------------------------------------------------------------------------------------------------------------------------------------------------------------------------------------------------------------------------------------------------------------------------------------------------------------------------------------------------------------------------------------------------------------------------------------------------------------------------------------------------------------------------------------------------------------------------------------------------------------------------------------------------------------------------------------------------------------------------------------------------------------------------------------------------------------------------------------------------------------------------------------------------------------------------------------------------------------------------------------------------------------------------------------------------------------------------------------------------------------------------------------------------------------------------------------------------------------------------------------------------------------------------------------------------------------------------------------------------------------------------------------------------------------------------------------------------------------------------------------------------------------------------------------------------------------------------------------------------------------------------------------------------------------------------------------------------------------------------------------------------------------------------------------------------------------------------------------------------------------------------------------------------------------------------------------------------------------------------------------------------------------------------------------------------------------------------------------------------------------------------------------------------------------------------------------------------------------------------------------------------------------------------------------------------------------------------------------------------------------------------------------------------------------------------------------------------------------------------------------------|
| <b>Manuscript Number:</b>                                                                                                                                                                                                                                                                                                           | PNTD-D-20-01322                                                                                                                                                                                                                                                                                                                                                                                                                                                                                                                                                                                                                                                                                                                                                                                                                                                                                                                                                                                                                                                                                                                                                                                                                                                                                                                                                                                                                                                                                                                                                                                                                                                                                                                                                                                                                                                                                                                                                                                                                                                                                                                                                                                                                                                                                                                                                                                                                                                                                                                                                                           |
| <b>Full Title:</b>                                                                                                                                                                                                                                                                                                                  | Natural Arbovirus Infection Rate and Detectability of Indoor Female <i>Aedes aegypti</i> from Merida, Yucatan, Mexico.                                                                                                                                                                                                                                                                                                                                                                                                                                                                                                                                                                                                                                                                                                                                                                                                                                                                                                                                                                                                                                                                                                                                                                                                                                                                                                                                                                                                                                                                                                                                                                                                                                                                                                                                                                                                                                                                                                                                                                                                                                                                                                                                                                                                                                                                                                                                                                                                                                                                    |
| <b>Short Title:</b>                                                                                                                                                                                                                                                                                                                 | Natural Arbovirus Infection Rate and Detectability of Indoor Female <i>Aedes aegypti</i> .                                                                                                                                                                                                                                                                                                                                                                                                                                                                                                                                                                                                                                                                                                                                                                                                                                                                                                                                                                                                                                                                                                                                                                                                                                                                                                                                                                                                                                                                                                                                                                                                                                                                                                                                                                                                                                                                                                                                                                                                                                                                                                                                                                                                                                                                                                                                                                                                                                                                                                |
| <b>Article Type:</b>                                                                                                                                                                                                                                                                                                                | Research Article                                                                                                                                                                                                                                                                                                                                                                                                                                                                                                                                                                                                                                                                                                                                                                                                                                                                                                                                                                                                                                                                                                                                                                                                                                                                                                                                                                                                                                                                                                                                                                                                                                                                                                                                                                                                                                                                                                                                                                                                                                                                                                                                                                                                                                                                                                                                                                                                                                                                                                                                                                          |
| <b>Keywords:</b>                                                                                                                                                                                                                                                                                                                    | Sampling, Prokopack, <i>Aedes</i> , Abundance, Density, Infection, Arbovirus                                                                                                                                                                                                                                                                                                                                                                                                                                                                                                                                                                                                                                                                                                                                                                                                                                                                                                                                                                                                                                                                                                                                                                                                                                                                                                                                                                                                                                                                                                                                                                                                                                                                                                                                                                                                                                                                                                                                                                                                                                                                                                                                                                                                                                                                                                                                                                                                                                                                                                              |
| <b>Abstract:</b>                                                                                                                                                                                                                                                                                                                    | <p><b>Background:</b> As <i>Aedes</i> -borne viruses (ABV) continue their resurgence and global expansion, there is a need to better quantify virus presence, co-circulation and transmission risk. Arbovirus infection in <i>Aedes aegypti</i> has historically been quantified over a small fraction of the adult population by pooling collected mosquitoes to increase detectability. However, there is a significant knowledge gap about the magnitude of natural arbovirus infection within areas of active transmission, as well as the sensitivity of detection of such an approach. Here we quantify the absolute <i>Aedes aegypti</i> density in houses with suspected active virus transmission, the absolute arbovirus infection rate in individually tested <i>Aedes aegypti</i> females, the sensitivity of using Prokopack aspirators in detecting arbovirus infected mosquitoes, and entomological inoculation rate (EIR) and vectorial capacity (VC) two measures ABV transmission potential.</p> <p><b>Methodology/Principal Findings :</b> We individually tested by RT-PCR 2,161 <i>Aedes aegypti</i> females collected indoors from 200 houses using Prokopack aspirators and found that 7.7% of them were positive to any ABV. Most infections were CHIKV (77.7%), followed by DENV (11.4%) and ZIKV (9.0%). The distribution of infected <i>Aedes aegypti</i> was overdispersed, 33% of houses contributing with 81% of the infected mosquitoes. A significant association between ABV infection and <i>Aedes aegypti</i> density indoors was found when the total catch, rather than number sampled, of <i>Aedes aegypti</i> was considered. Indeed, such lack of association was driven by a low sensitivity of routine indoor aspirator collections in detecting ABV infections (sensitivity was 16.3% and 23.4% for detecting individually infected mosquitoes and houses, respectively). When averaged across all infested houses, mean EIR ranged between 0.04 and 0.06 infective bites per person per day, and mean VC was 0.6 infectious vectors generated from a population feeding on a single infected host per house/day. Both measures were significantly and positively associated with total density indoors.</p> <p><b>Conclusions/Significance:</b> Our findings provide evidence that the accurate estimation and quantification of arbovirus infection rate and transmission risk is a function of the collection method used, the sampling effort, the local abundance of <i>Aedes aegypti</i> and the intensity of arbovirus circulation.</p> |
| <b>Additional Information:</b>                                                                                                                                                                                                                                                                                                      |                                                                                                                                                                                                                                                                                                                                                                                                                                                                                                                                                                                                                                                                                                                                                                                                                                                                                                                                                                                                                                                                                                                                                                                                                                                                                                                                                                                                                                                                                                                                                                                                                                                                                                                                                                                                                                                                                                                                                                                                                                                                                                                                                                                                                                                                                                                                                                                                                                                                                                                                                                                           |
| <b>Question</b>                                                                                                                                                                                                                                                                                                                     | <b>Response</b>                                                                                                                                                                                                                                                                                                                                                                                                                                                                                                                                                                                                                                                                                                                                                                                                                                                                                                                                                                                                                                                                                                                                                                                                                                                                                                                                                                                                                                                                                                                                                                                                                                                                                                                                                                                                                                                                                                                                                                                                                                                                                                                                                                                                                                                                                                                                                                                                                                                                                                                                                                           |
| <p><b>Financial Disclosure</b></p> <p>Enter a financial disclosure statement that describes the sources of funding for the work included in this submission. Review the <a href="#">submission guidelines</a> for detailed requirements. View published research articles from <a href="#">PLOS NTDs</a> for specific examples.</p> | <p>The funders had no role in study design, data collection and analysis, decision to publish, or preparation of the manuscript.</p>                                                                                                                                                                                                                                                                                                                                                                                                                                                                                                                                                                                                                                                                                                                                                                                                                                                                                                                                                                                                                                                                                                                                                                                                                                                                                                                                                                                                                                                                                                                                                                                                                                                                                                                                                                                                                                                                                                                                                                                                                                                                                                                                                                                                                                                                                                                                                                                                                                                      |

This statement is required for submission and **will appear in the published article** if the submission is accepted. Please make sure it is accurate.

#### Unfunded studies

Enter: *The author(s) received no specific funding for this work.*

#### Funded studies

Enter a statement with the following details:

- Initials of the authors who received each award
- Grant numbers awarded to each author
- The full name of each funder
- URL of each funder website
- Did the sponsors or funders play any role in the study design, data collection and analysis, decision to publish, or preparation of the manuscript?
- **NO** - Include this sentence at the end of your statement: *The funders had no role in study design, data collection and analysis, decision to publish, or preparation of the manuscript.*
- **YES** - Specify the role(s) played.

\* typeset

#### Competing Interests

Use the instructions below to enter a competing interest statement for this submission. On behalf of all authors, disclose any [competing interests](#) that could be perceived to bias this work—acknowledging all financial support and any other relevant financial or non-financial competing interests.

This statement **will appear in the published article** if the submission is

The authors have declared that no competing interests exist.

accepted. Please make sure it is accurate. View published research articles from [PLOS NTDs](#) for specific examples.

#### **NO authors have competing interests**

Enter: *The authors have declared that no competing interests exist.*

#### **Authors with competing interests**

Enter competing interest details beginning with this statement:

*I have read the journal's policy and the authors of this manuscript have the following competing interests: [insert competing interests here]*

\* typeset

#### **Data Availability**

Authors are required to make all data underlying the findings described fully available, without restriction, and from the time of publication. PLOS allows rare exceptions to address legal and ethical concerns. See the [PLOS Data Policy](#) and [FAQ](#) for detailed information.

A Data Availability Statement describing where the data can be found is required at submission. Your answers to this question constitute the Data Availability Statement and **will be published in the article**, if accepted.

Yes - all data are fully available without restriction

**Important:** Stating 'data available on request from the author' is not sufficient. If your data are only available upon request, select 'No' for the first question and explain your exceptional situation in the text box.

Do the authors confirm that all data underlying the findings described in their manuscript are fully available without restriction?

**Describe where the data may be found in full sentences. If you are copying our sample text, replace any instances of XXX with the appropriate details.**

- If the data are **held or will be held in a public repository**, include URLs, accession numbers or DOIs. If this information will only be available after acceptance, indicate this by ticking the box below. For example: *All XXX files are available from the XXX database (accession number(s) XXX, XXX).*
- If the data are all contained **within the manuscript and/or Supporting Information files**, enter the following: *All relevant data are within the manuscript and its Supporting Information files.*
- If neither of these applies but you are able to provide **details of access elsewhere**, with or without limitations, please do so. For example:

*Data cannot be shared publicly because of [XXX]. Data are available from the XXX Institutional Data Access / Ethics Committee (contact via XXX) for researchers who meet the criteria for access to confidential data.*

The data underlying the results presented in the study are available from the corresponding author upon request.

|                                                                                                                                                                                                                                                                                                                                                          |                                                                                                                                                                                         |
|----------------------------------------------------------------------------------------------------------------------------------------------------------------------------------------------------------------------------------------------------------------------------------------------------------------------------------------------------------|-----------------------------------------------------------------------------------------------------------------------------------------------------------------------------------------|
| <p><i>The data underlying the results presented in the study are available from (include the name of the third party and contact information or URL).</i></p> <ul style="list-style-type: none"> <li>• This text is appropriate if the data are owned by a third party and authors do not have permission to share the data.</li> </ul> <p>* typeset</p> |                                                                                                                                                                                         |
| <p>Additional data availability information:</p>                                                                                                                                                                                                                                                                                                         | <p>Tick here if the URLs/accession numbers/DOIs will be available only after acceptance of the manuscript for publication so that we can ensure their inclusion before publication.</p> |

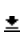

1 **Natural Arbovirus Infection Rate and Detectability of Indoor Female**

2 ***Aedes aegypti* from Merida, Yucatan, Mexico.**

3 Oscar David Kirstein<sup>1, ¶</sup>, Guadalupe Ayora-Talavera<sup>3, ¶</sup>, Edgar Koyoc-Cardena<sup>2</sup>, Daniel Chan Espinoza<sup>2</sup>,  
4 Azael Che-Mendoza<sup>2</sup>, Azael Cohuo-Rodriguez<sup>2</sup>, Pilar Granja-Pérez<sup>5</sup>, Henry Puerta-Guardo<sup>2</sup>, Norma Pavia-  
5 Ruz<sup>4</sup>, Mike W. Dunbar<sup>1</sup>, Pablo Manrique-Saide<sup>2</sup> and Gonzalo M. Vazquez-Prokopec<sup>1\*</sup>

6

7 <sup>1</sup>Department of Environmental Sciences, Emory University, Atlanta, GA, USA.

8 <sup>2</sup>Unidad Colaborativa de Bioensayos Entomológicos, Campus de Ciencias Biológicas y Agropecuarias,  
9 Universidad Autónoma de Yucatán, Mérida, Yucatán, México.

10 <sup>3</sup>Laboratorio de Virología. Centro de Investigaciones Regionales “Dr. Hideyo Noguchi”, Universidad  
11 Autónoma de Yucatán, Mérida, Yucatán, México.

12 <sup>4</sup>Laboratorio de Hematología. Centro de Investigaciones Regionales “Dr. Hideyo Noguchi”, Universidad  
13 Autónoma de Yucatán, Mérida, Yucatán, México.

14 <sup>5</sup>Laboratorio Estatal de Salud Pública, Servicios de Salud de Yucatán, Mérida, Yucatán, México.

15 ¶ These authors contributed equally to this work.

16 \*Correspondence: [gm vazqu@emory.edu](mailto:gm vazqu@emory.edu)

17

18

19

20

21

22

23 **Abstract**

## 24 **Background**

25           As *Aedes*-borne viruses (ABV) continue their resurgence and global expansion, there is a need to  
26 better quantify virus presence, co-circulation and transmission risk. Arbovirus infection in *Aedes aegypti*  
27 has historically been quantified over a sample of the adult population by pooling collected mosquitoes  
28 to increase detectability. However, there is a significant knowledge gap about the magnitude of natural  
29 arbovirus infection within areas of active transmission, as well as the sensitivity of detection of such an  
30 approach. Here we quantify the absolute *Aedes aegypti* density in houses with suspected active virus  
31 transmission, the absolute arbovirus infection rate in individually tested *Aedes aegypti* females, the  
32 sensitivity of using Prokopack aspirators in detecting arbovirus infected mosquitoes, and entomological  
33 inoculation rate (EIR) and vectorial capacity (VC), two measures ABV transmission potential.

## 34 **Methodology/Principal Findings**

35           We individually tested by RT-PCR 2,161 *Aedes aegypti* females collected indoors from 200  
36 houses using Prokopack aspirators and found that 7.7% of them were positive to any ABV. Most  
37 infections were CHIKV (77.7%), followed by DENV (11.4%) and ZIKV (9.0%). The distribution of infected  
38 *Aedes aegypti* was overdispersed, 33% of houses contributed with 81% of the infected mosquitoes. A  
39 significant association between ABV infection and *Aedes aegypti* density indoors was found when *Ae.*  
40 *aegypti* total catch, rather than number sampled, was considered. Indeed, such lack of association was  
41 driven by a low sensitivity of routine indoor aspirator collections in detecting ABV infections (sensitivity  
42 was 16.3% and 23.4% for detecting individually infected mosquitoes and houses, respectively). When  
43 averaged across all infested houses, mean EIR ranged between 0.04 and 0.06 infective bites per person  
44 per day, and mean VC was 0.6 infectious vectors generated from a population feeding on a single  
45 infected host per house/day. Both measures were significantly and positively associated with total *Ae.*  
46 *aegypti* density indoors.

47 **Conclusions/Significance**

48 Our findings provide evidence that the accurate estimation and quantification of arbovirus  
49 infection rate and transmission risk is a function of the collection method used, the sampling effort, the  
50 local abundance of *Aedes aegypti* and the intensity of arbovirus circulation.

51

52 **Keywords: sampling, Prokopack, *Aedes*, abundance, density, infection, arbovirus**

53

54 **Author summary**

55 *Aedes*-borne diseases comprise a serious public health burden in many parts of the world,  
56 usually affecting low income areas. The ability to detect virus circulation within a population may be key  
57 in responding to the threat of outbreaks, providing a cost-effective approach for triggering vector  
58 control. Unfortunately, gaps in the knowledge of natural *Aedes*-borne virus (ABV) infection in *Aedes*  
59 *aegypti* have led to uncertainties in the consideration of entomo-virological approaches for virus  
60 surveillance. Here, we show that the natural infection rate in a mosquito population may not be a  
61 function of where *Aedes aegypti* are, but rather where key human-mosquito contacts occur. Sampling  
62 200 houses with suspected ABV active transmission led us to quantify high virus infection rates in all  
63 *Aedes aegypti* present in the house and use such information to estimate the sensitivity of indoor  
64 aspiration with Prokopack devices and two measures of ABV transmission potential. Our findings  
65 provide evidence that the accurate estimation and quantification of arbovirus infection rate and  
66 transmission risk is a function of the collection method used, the sampling effort, the local abundance of  
67 *Aedes aegypti* and the intensity of arbovirus circulation. Results from this study are relevant to  
68 understand the value of vector surveillance via entomo-virologic surveys, and for the design of  
69 entomological endpoints relevant for epidemiological trials quantifying the impact of vector control on  
70 ABVs.



## 71 Introduction

72 Emerging *Aedes*-borne viruses (ABVs) such as chikungunya (CHIKV), Dengue (DENV) and Zika  
73 (ZIKV) contribute significantly to the global burden of infectious diseases [1-3]. Transmitted primarily by  
74 the ubiquitous and highly anthropophilic mosquito *Aedes aegypti*, these viruses have propagated  
75 throughout tropical and subtropical urban environments often co-circulating within the same period and  
76 geographical areas [4-8]. Infections of CHIKV, DENV and ZIKV can present similar manifestation, ranging  
77 from asymptomatic to mild or inapparent to severe illness with life-threatening manifestations and  
78 death [6, 9]. ZIKV and CHIKV infections, particularly in the Americas, have been linked to fetus  
79 abnormalities during pregnancy, neurological complications, and chronic joint diseases in adults that can  
80 persist for even years [10, 11]. The co-circulation of arboviral infections and their epidemic propagation  
81 challenge differential diagnoses, primary patient care, and limit the effectiveness of existing vector  
82 control tools [5, 8, 12-15]. Furthermore, the lack of accurate entomological correlates of ABV risk [2, 16,  
83 17], is affected by multiple sources of bias including the difficulty of detecting and accurately quantifying  
84 immature or adult *Ae. aegypti* density [18], the exposure of people to mosquitoes in residences other  
85 than their homes [19, 20], the variable level of susceptibility in the human population against each virus  
86 [21], or the limit of identification of entomological triggers for informing vector control [22].

87 *Aedes aegypti* is considered a very efficient vector of ABVs even at low apparent population  
88 densities [23, 24]. A common assumption in ABV research is that due to the low vector density and focal  
89 nature of human-mosquito contacts [19], natural arbovirus infection in *Ae. aegypti* is very low [25],  
90 limiting the implementation of entomo-virological surveillance systems as conducted for other urban  
91 arbovirus (e.g., West Nile virus [26]).

92 The estimation of infection rates in mosquito populations depends on the methodology used to  
93 detect viral infection. Methods for virus detection include cell culture [27, 28], immunoassay [27, 29]   
94 molecular methods, with reverse transcription–polymerase chain reaction (RT-PCR) followed by

95 amplicon sequence [5, 8, 30]. The latter is considered the benchmark for infection confirmation and  
96 virus discrimination.  Given their cost, and often limited mosquito yields, ABV detection tends to be  
97 conducted in pools of mosquitoes, generally between 10 and 20 individuals per pool [26]. In the  
98 presence of focal transmission (e.g., multiple infected mosquitoes within a single premise, infecting  
99 many individuals), such pooling method may lead to bias in the estimation of ABV natural infection rates  
100 [31, 32]. Part of this bias is introduced by the calculation of the minimum infection rates (MIR) and the  
101 maximum likelihood rate (MLR), which make different assumptions about the frequency and  
102 aggregation of infection rates, but that are not sensitive to extreme variability in the distribution of  
103 infected mosquitoes [26, 32, 33].

104         Despite these assumption and limitations, multiple research groups have quantified infection  
105 rates in *Ae. aegypti* with different levels of success. ABV entomo-virological characterization in *Ae.*  
106 *aegypti* from northern Brazil detected only 7 out of 37 pools (containing 10 mosquitoes each) tested and  
107 ~1000 mosquitoes collected [8]. A study conducted during the DENV transmission peak in Mérida,  
108 Mexico, found that after individually testing *Ae. aegypti* mosquitoes only 66 females out of 10,254 (<1%)  
109 were positive for DENV [29]. These findings outline a common issue with population-wide cross-  
110 sectional quantifications of ABV infection: the natural infection rate of an *Ae. aegypti* population may  
111 not be a function of where *Ae. aegypti* are, but rather where key human-mosquito contacts occur [34].  
112 The possibility for early detection of virus circulation within a population may be key in preventing  
113 outbreaks, providing a cost-effective approach for triggering vector control. In a study conducted in  
114 Guerrero, Mexico, circulation of CHIKV was detected 10 days before any reported symptomatic human  
115 case, which allowed for early vector control actions and outbreak mitigation [7, 35].

116         The capacity of capturing a considerable and representative sample of mosquitoes is necessary  
117 for a comprehensive characterization of their natural infection. A myriad of adult *Ae. aegypti* sampling  
118 methods have been used for quantifying ABV natural infection rate. While passive traps (BG sentinel,

119 sticky ovitraps, Gravid *Aedes* traps, autocidal *Aedes* gravid ovitrap [36]) may allow for widespread  
120 coverage, they also require multiple days for capturing enough mosquitoes for virus testing and their  
121 sensitivity to vector and virus detection is unknown. Adult aspiration, while it is assumed to be more  
122 laborious and dependent on trained staff, provides an instantaneous measure of vector density and is  
123 considered a gold standard for adult *Ae. aegypti* collection [36, 37]. Applying sequential removal  
124 sampling using Prokopack aspirators [18, 37] the absolute density of *Ae. aegypti* was found to be up to  
125 five times bigger than previously estimated implementing the standard 10-minute collection period per  
126 household. As all studies quantifying ABV infection in *Ae. aegypti* have sampled a small fraction of the  
127 adult population and pooled collected mosquitoes to increase yield and detectability, there is a  
128 significant knowledge gap with regards to the magnitude of natural ABV infection rates within areas of  
129 active transmission.

130         There is a need for improving the evidence base of the epidemiological impact of vector control  
131 on ABV [38]. Estimates of ABV infection in *Ae. aegypti* infection could be calculated as measures of  
132 intervention impact, provided they are accurately quantified. In preparation for a clinical trial evaluating  
133 the epidemiological impact of targeted indoor residual spraying (TIRS) on ABVs [39], here we extended  
134 an observational study that used exhaustive Prokopack collections to quantify absolute *Ae. aegypti*  
135 density in houses with suspected active virus transmission [18], to quantify absolute ABV infection rate  
136 in individual *Ae. aegypti*. As a secondary analysis, we used this dataset to quantify the sensitivity of  
137 indoor adult *Ae. aegypti* collections using Prokopack aspirators in detecting ABV-infected mosquitoes,  
138 and quantified measures transmission potential.

139

## 140 **Material and Methods**

### 141 **Study area and design**

142 The study was conducted in Merida (population ~1 million), Yucatan, Mexico. Merida is endemic  
143 for dengue [3, 4, 40] and, as most of the Americas, was recently and sequentially invaded by CHIKV and  
144 ZIKV [14]. Arbovirus transmission is seasonal, peaking during the rainy season (July-November). Since  
145 2011, Merida is home of a longitudinal cohort study called “Familias sin Dengue” (FSD, Families without  
146 dengue) that has characterized arbovirus infection and seroconversion rates and the entomological  
147 correlates of dengue infection [3, 4, 40]. Our study design originally involved selecting a total of 200  
148 houses within FSD city blocks where recent (within 1 month) CHIKV, ZIKV or DENV occurred [18].  
149 Surveillance for symptomatic cases occurred between June and December for two transmission seasons  
150 (2016-2017). Given the protocols for human subjects and household access, the team receive a list of  
151 houses without information of how many individuals were infected (or when onset of symptoms  
152 occurred) or the virus infecting them. Therefore, the entomological team only had a list of houses to  
153 visit, and they were blind to any information about arbovirus infection status or intensity in each house.  
154 Collections occurred in a period of ABV transmission in Merida, with DENV and CHIKV being reported to  
155 the city’s passive surveillance system in 2015, and the introduction of ZIKV since 2016 onwards (Fig. S1).  
156 After obtaining informed consent from householders, exhaustive adult mosquito collections with  
157 Prokopack aspirators [22] were conducted using removal sampling, as described by Koyoc-Cardeña et al.  
158 [18]. Briefly, trained fieldworkers sequentially entered each house and collected mosquitoes from each  
159 room (including the kitchen and bathroom). Removal sampling was conducted with a constant effort at  
160 predefined intervals of 10 min over the course of three hours or, if during two consecutive rounds no  
161 *Ae. aegypti* were captured.

162 Collected mosquitoes were transported alive to the Autonomous University of Yucatan  
163 entomology lab (UCBE-UADY) and immobilized at -20 °C for 10 min for sexing and taxonomical  
164 identification using standard keys. Additionally, blood-fed female *Ae. aegypti* were classified by the  
165 degree of blood digestion according to the Sella scale [41, 42], which was extended to include recent

166 feeding as a category (the presence of bright red blood was indicative of blood feeding within 24h of  
167 collection, and assigned a category '2' of Sella). Finally, male and female *Ae. aegypti* were individually  
168 dissected, their heads and bodies were separated and preserved in 1.5ml vials containing RNALater  
169 (Thermo Fisher Scientific, Waltham, MA, USA) with 1.5µl Tween® 20 (Sigma-Aldrich Co.) and stored at -  
170 20°C for future virus detection by molecular methods.

## 171 **Ethics Statement**

172 Protocols for this study were approved by Emory University's ethics committee under  
173 protocol ID: IRB00082848. The protocol was also approved by the Ethics and Research  
174 Committee from the O'Horan General Hospital from the state Ministry of Health, Register No.  
175 CEI-0-34-1-14. Written informed consent was obtained from the head of household prior to  
176 mosquito collection. 

177

## 178 **Detection of arboviral infections in *Ae. aegypti***

179 Initially, RNA was extracted from bodies (thorax, abdomen and extremities). Individual  
180 specimens were homogenized using a cordless motor tissue distributor (Kimble®) in a 1.5ml  
181 microcentrifuge tube with 150µl of PBS 1X, p.H 7.2 (GIBCO®) and centrifuged at 4°C for 10 minutes at  
182 1,500g. Total RNA was extracted from 140µl of the mosquito's body disruption supernatant using  
183 QIAamp Viral RNA Mini Kit (QIAGEN®) following the manufacturer's recommendations. Finally, extracted  
184 RNA was eluted with 40µl of RNA-ase free water and preserved at -80°C. RNA extraction from heads was  
185 performed only from bodies that were positive for any of the targeted virus.

186 Detection of viral RNA was carried out by real-time RT-PCR using a probe-based detection  
187 method with a QuantiFast Probe RT-PCR Kit (QIAGEN®). RT-PCR reactions were performed in a Step One  
188 Plus Real-Time PCR System (Applied Biosystems®) following standard protocols. Reactions (samples)  
189 were considered positive when a sigmoidal curve was detected at a Ct value ≤38 cycles of amplification.

190 Table S1 shows the Primers and probes used to target CHIKV, ZIKV [43, 44] and DENV (personal  
191 communication from Davis Arbovirus Research & Training).

192 Positive samples for CHIKV and ZIKV were reconfirmed by end-point RT-PCR using a high-fidelity  
193 polymerase, SuperScript™ III One-Step RT-PCR System with Platinum™ Taq DNA polymerase (Thermo  
194 Fisher Scientific). Primers were specifically designed to target a 420bp fragment of the viral gene E1 of  
195 CHIKV (including the M13 universal sequence, underlined): Fwd (5' –  
196 TGTTAAACGACGGCCAGTAGACGTCTATGCTAATACACAACTG - 3') and Rev (5' –  
197 CAAGAAACAGCTATGACCTGAGAATTCCTTCAACTTCTATCT - 3'); or a fragment of 662 bp of the viral gene  
198 NS1 of ZIKV (primers were kindly provided by MSc. Jesus Reyes and are available upon request). PCR  
199 positive amplicons were sequenced for molecular confirmation of virus presence. For DENV, sequencing  
200 was performed on the amplicons obtained from the qRT-PCR, corresponding to a fragment of 212 bp of  
201 the NS5 viral gene. Samples with evidence of ABV infection by qRT-PCR were sent to Macrogen corp®  
202 and sequenced by Sanger Method.

203

#### 204 **Sequence analysis**

205 Single forward and reverse raw sequencing data were assessed based on quality score. Reads  
206 were compared to those from the GenBank database using NCBI BLASTN  
207 (<https://blast.ncbi.nlm.nih.gov/Blast.cgi>) at default parameters (Madden 2013). BLAST “hits” were used  
208 to assign reads to virus type, statistical significance was measured by the E-value and percentage or  
209 coverage. Reads that did not fulfill these conditions were considered potential chimeric sequences and  
210 discarded. Visualization of electropherograms, nucleotide sequences manipulation, alignment and  
211 analysis were performed using the software *Genious Prime* 2020.0.4 [45].

212

#### 213 **Data analysis**

214 In the context of this study, absolute *Ae. aegypti* density per house (termed total catch) was  
215 calculated as the sum of adult females collected across all sampling rounds, whereas relative density  
216 was calculated as the number of females per unit time (e.g., 10 minutes). For analyses, houses were  
217 categorized based on their *Ae. aegypti* female total catch as high ( $\geq 10$  collected) or low ( $<10$  collected),  
218 as in Koyoc-Cardena et al. [18]. Absolute natural infection rate was calculated as the total number of  
219 infected females divided by the total catch per house, whereas relative natural infection rate was  
220 calculated as the number of infected and collected *Ae. aegypti* within a given unit of collection time  
221 (e.g., 10-minutes). The sensitivity of the adult aspiration to the detection of infected *Ae. aegypti*  
222 mosquitos was estimated by plotting the cumulative relative natural infection rate as a function of the  
223 collection time (catch effort). Chi-squared tests were used to compare infection rates by house, based  
224 on their density category (low vs high). To quantify the relationship between female adult *Ae. aegypti*  
225 density (count variable) and ABV infection (binary variable: infected = 1, not infected = 0) at the house  
226 level, generalized linear mixed models with a binomial link function and a random intercept associated  
227 with each house ID were employed, as described in Vazquez-Prokopec et al. [20]. The same model was  
228 extended to include other predictor variables, such as the presence of a blood meal in the mosquito  
229 (binary) or the Sella engorgement score of females (categorical). Akaike information criterion (AIC) was  
230 used to identify the best model, among all models tested [46].

231 Two measures of ABV transmission potential were calculated using individual-level estimates of biting  
232 probability, infection, and vector density. The Entomological Inoculation Rate (EIR, expressed as the  
233 number of potentially infectious bites per person per day), routinely calculated for malaria [47], is  
234 considered a reliable measure of human exposure to infectious mosquitoes.

235 We calculated the EIR of ABVs at the household-level using the following equation:  $IP = mas$ ; where  
236  $m$  is the ratio of *Ae. aegypti* females to the number of residents of each house,  $a$  is the number of bites  
237 per day (calculated as the ratio of *Ae. aegypti* females with Sella's score 2 by the total number of *Ae.*

238 *aegypti* females per house; Sella's score 2 indicates evidence of a bloodmeal within 24hs of capture) and  
239  $s$  is the proportion of *Ae. aegypti* females found infected with any ABV. 

240 Vectorial capacity (VC) is a common metric that estimates the number of infectious vectors  
241 generated from a population feeding on a single infected host per unit area/time [48]. Here, we  
242 estimated the daily VC of ABVs per house, as follows:  $VC = \frac{ma^2p^n}{-Ln(p)}$ , where  $m$  and  $a$  are equivalent as in  
243 EIR and  $p$  is the daily survival probability of female mosquitoes (set as  $p=0.7$ ) and  $n$  the extrinsic  
244 incubation period (set as  $n=1/5$  days).

245 We calculated both EIR and VC for the total catch as well as the first round and conducted  
246 paired t-test to evaluate the difference in their value between samples by house. A GLMM with a  
247 Gaussian link function and random effect at the house level was applied to evaluate the association  
248 between each metric (EIR, VC set as dependent variables) and the total catch of *Ae. aegypti* by house.

249 All analyses were performed within the R programming environment ([https://www.r-proje](https://www.r-project.org/)  
250 [ct.org/](https://www.r-project.org/)) and GAMMs were run using the *lme4* package [34].

251

## 252 **Results**

### 253 **Characteristics of ABV-infected *Ae. aegypti***

254 A total of 3,439 *Ae. aegypti* were collected in 179 houses, with 2,161 being females (62.8%). Of  
255 all collected females, 166 (7.7%) were positive for arbovirus infection (Table 1). The majority of  
256 infections were identified as positive for CHIKV (77.7%), followed by DENV (11.4%) and ZIKV (9.0%);  
257 coinfection with CHIKV and ZIKV was detected in three mosquitoes (1.8%) (Table 1). Of the total ABV-  
258 infected females, 38 (22.9%) had evidence of infection in their heads; 33 (86.8%) of them were positive  
259 for CHIKV, 1 (2.6%) for ZIKV, and 1 (2.6%) for DENV (Table 2). Additionally, 3 (7.9%) coinfections with  
260 CHIKV and ZIKV were detected in three heads, which correspond to coinfections also detected in their  
261 bodies (Table 2).



262 Out of the total number of female mosquitoes, 81.3% were blood feed, at different blood  
263 feeding status (Sella's score), with 26.0% of them being fed **withing** 24-h of collection (Sella's score 2).  
264 The majority of positive females were blood engorged at the different blood feeding status (86.1%), with  
265 34.3% freshly feed (Sella 2; Table 3). The remaining 33.1% of infected females were either unfed (19.3%  
266 - Sella 1) or gravid (13.2% - Sella 7) (Table 3). A 7.2% (n=12) of the positive heads corresponded to  
267 positive bodies of female mosquitoes that were also classified with Sella score 2 (Table 3).

268

### 269 **Natural ABV infection rate of female *Ae. aegypti***

270 At the house level and when using the total catch of *Ae. aegypti*, ABV infections were detected  
271 in 43 houses (25.4%) out of 169 houses infested with female mosquitoes. In those 43 houses, ABV  
272 infections were divided as follow: 37.2% for CHIKV, 27.9% for DENV, and 25.6% for ZIKV (Table 1).  
273 Additionally, co-occurrence of mosquitoes infected with any of the three viruses was detected in 3  
274 houses (7.0%) and 3 specimens of *Ae. aegypti* mosquitos co-infected with CHIKV and ZIKV were found in  
275 a single house (2.3%) (Table 1). The median of infected mosquitoes per positive houses was 1  
276 (interquartile range [IQR]= 4-1). The distribution of positive females per house varied by virus, and for  
277 CHIKV was highly skewed with a maximum of 25 CHIKV infected *Ae. aegypti* in one house (Fig. 1).  The  
278 high overdispersion was further evidenced by the finding of 32.6% of houses contributing with 81.3% of  
279 the infected mosquitoes (Fig. 1).

280 A significantly higher proportion of houses were found infected by any ABV in the high-density  
281 group (42.9%) compared to the low-density group (13.1%) ( $X^2_{(df=1)} = 17.6, P < 0.001$ ). When mosquito  
282 density was high, a larger proportion of houses had mosquitoes infected with CHIKV (18.6%) compared  
283 to DENV (12.9%) or ZIKV (8.6%); a 4.3% co-occurrence of infected mosquitoes with either virus was  
284 observed in high density houses. Comparatively, there was a similar proportion of houses with positive  
285 mosquitoes for each virus when mosquito density was low (Fig. 2A). When analyzing mosquitoes with

286 positive heads, only 3.0% were found in low-density houses while positive mosquito heads were found  
287 in 18.6% of high-density houses (Fig. 2B). The probability of finding infected *Ae. aegypti* was significantly  
288 associated with absolute density indoors (binomial GLMM (Odds Ratio [95% CI]): 1.0 [1.0 – 1.1]), with  
289 houses having more than 40 *Ae. aegypti* females having a probability infection above 60% (Fig. 3). When  
290 only considering infected female heads, no association with absolute density was found (1.0 [0.9 - 1.1]).  
291 Sella score did not have any significant association with infection for all adults or infected heads (Table  
292 S2).

293 Fig. 4 shows the sensitivity of Prokopack collections to the detection of ABV infected *Ae. aegypti*  
294 females. Performing a single 10-min Prokopack collection indoors led to a low (16.3%) sensitivity of  
295 detecting an ABV infected house (Fig. 4A) or infected female (23.4%) (Fig. 4B). The low sensitivity  
296 translated to each individual virus, both for houses (15.0% for CHIKV, 5.3% for DENV and, 25.0% for  
297 ZIKV) and individual mosquitoes (25.9% for CHIKV, DENV 5.3% and ZIKV 23.8%) (Fig. 4). As collection  
298 time increased, the sensitivity of detection increased both for houses and mosquitoes, reaching an  
299 asymptote at ~120 min for any viral infection (Fig. 4). Aggregating data from the first two sampling  
300 rounds (i.e. equivalent to performing a 20-min collection) led to an increase in household infection  
301 sensitivity (+16.3% for any adults, +15.0% for CHIKV, +26.3% for DENV and +15.0% for ZIKV; Fig. 4A) and  
302 individual mosquito sensitivity (+17.5% for any adults, +16.8% for CHIKV, +26.3% for DENV and +14.3%  
303 for ZIKV; Fig. 4B).

304

### 305 ***Estimates of ABV transmission potential***

306 The ratio of *Ae. aegypti* females to humans ( $m$ ) increased significantly between the sampled  
307 mosquito density and the total catch (paired t-test = 6.4312, df = 199,  $p < 0.001$ ; Fig. 5A, Table S3). At  
308 densities higher than 4 *Ae. aegypti* females, a GLMM predicted  $m$  would surpass one; the maximum  
309 observed  $m$  was 30 mosquitoes per person (Fig. 5B). When averaged across all infested houses, mean

310 EIR ranged between 0.04 and 0.06 infective bites per person per day, with estimates for total catch and  
311 sample being not statistically significant (paired t-test = -1.2988, df = 103, p = 0.1969) (Fig. 5C, Table S3).  
312 When only houses with infected *Ae. aegypti* were considered, mean EIR for the total catch increased to  
313 0.28 infectious bites per person per day (Standard Deviation = 0.36; range =0.01-1.5). Increasing total  
314 catch indoors lead to slight predicted variation in EIR (Fig. 5D) likely due to the low infection rate  
315 (parameter  $s$ ).  
316 ABV transmission potential, measured as mean VC, was significantly higher for the total catch than the  
317 sample (t = -2.6487, df = 103, p-value = 0.009) (Fig. 5E). When scaled by total catch indoors, VC showed a  
318 significant increase from 1.0 below 20 *Ae. aegypti* females per house to 3.0 at density of 70 mosquitoes  
319 per house; the maximum VC estimate registered was 5.9 (Fig. 5F, Table S3).  
320 Large variability in feeding frequency (Fig. S2) influenced estimates of VC and EIR, for instance a house  
321 with a total catch of 60 had only 2 females *Ae. aegypti* with Sella's score 2, leading to a low estimate of  
322 parameter  $a$ .

323

#### 324 **Nucleotide sequence analysis**

325 Sanger sequencing confirmed with high fidelity the presence the three ABVs targeted by RT-PCR  
326 (Table S4). High-quality reads matched perfectly or nearly perfectly (BLASTn search hit >90% identity) to  
327 CHIKV, DENV and ZIKV genomes published in NCBI GenBank. Consensus sequences were assembled for  
328 most samples sequenced for CHIK and ZIKV and will be used for future phylogenetic analysis. For DENV,  
329 ten single strand sequences confirmed DENV type 4 serotype as the circulating serotype (Table S4). The  
330 virus identity of all positive heads matched the identity of the virus for the corresponding positive  
331 bodies (Table S4).

332

#### 333 **Discussion**

334 CHIKV, DENV and ZIKV transmission risk appears to be correlated with the vector density and  
335 the number of infected mosquitoes at a coarse scale (entire cities, sub-national units) [25, 26], but such  
336 association between entomological indices and ABV incidence is generally inconsistent at the local level  
337 [26, 31, 49]. Our findings show that sampling bias in the quantification of vector density and in virus  
338 detection sensitivity as well as strong overdispersion in the distribution of infected mosquitoes may be  
339 important contributors to such inconsistency. We found that the sensitivity of routine Prokopack  
340 collections (10 min per house), considered a gold standard for indoor adult *Ae. aegypti* collections, in  
341 detecting houses with infected *Ae. aegypti* mosquitoes was below 25%. Furthermore, when infection  
342 was quantified in the total catch, approximately 80% of all infected mosquitoes were collected from  
343 ~30% of infested houses. Both findings are relevant for the design of sampling schemes aimed at  
344 entomo-virological surveillance of *Ae. aegypti*, as it is evident that detecting infected mosquitoes will be  
345 a function of the collection method used, the sampling effort, the local abundance of *Ae. aegypti* and  
346 the intensity of arbovirus circulation.

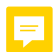

347 In our previous study, we quantified that houses may harbor up to five times more adult *Ae.*  
348 *aegypti* than estimated during routine Prokopack collections [18]. These data show that the low  
349 apparent density of *Ae. aegypti* indoors [50] may also be a function of the sensitivity of the collection  
350 method. The ability of *Ae. aegypti* to feed frequently (~1.5 days) and of distributing bites on some  
351 individuals more than others (aka., heterogeneous biting) [51-53] are considered the mechanisms  
352 compensating for the low *Ae. aegypti* density and human-mosquito rates [15]. Here we show that  
353 including the total *Ae. aegypti* population indoors (in our study, by factor of 5x) significantly elevates  
354 human - mosquito contacts and can have profound effects on estimates of natural infection and ABV  
355 transmission risk. While we did not directly measure heterogeneous biting (which requires DNA profiling  
356 in mosquitoes and humans), we evidenced its powerful epidemiological effect in the strong  
357 overdispersion of infection in collected mosquitoes. Seven houses harbored more than 10 CHIKV

358 infected females each, with one having up to 25 infected females. Aggregation of bites on one or a few  
359 infected individuals is the most likely explanation for such remarkable aggregation of infection. As  
360 transmission of ABVs is shaped by the daily mobility patterns of humans [19, 54], any residents or  
361 visitors to such 'key locations' may experience a disproportionately high risk of infection. Evaluating the  
362 impact of observed total density of *Ae. aegypti* per house (which may well reach 100 females per house,  
363 [18]) on ABV transmission dynamics may help understand both the stability of virus transmission chains  
364 and the impact of novel interventions focused on the indoor adult population.

365 Several innovative strategies are being evaluated for their epidemiological impact on ABVs.  
366 Targeted Indoor Residual Spraying (TIRS), capitalizes on indoor resting behavior of *Ae. aegypti* (which  
367 primarily is found resting below 1.5 m and in dark surfaces) to deliver long-lasting residual insecticides  
368 that can significantly reduce vector density and dengue transmission [55, 56]. *Wolbachia* population  
369 replacement or suppression approaches rely on the release of adults and capitalize their mating strategy  
370 to either render the population incompetent to transmission or reduce adult female density,  
371 respectively [57]. Spatial repellents are volatilized pyrethroids that disrupt mosquito behavior and  
372 reduce human-mosquito contacts indoors, without apparent impact on population density [58]. All such  
373 approaches are dependent on an accurate characterization of the population density of the vector (for  
374 instance, release rates need accurate density estimates, repellency may not be effective at high vector  
375 numbers, residual effect may increase evolution of resistance at high densities) and careful monitoring  
376 of their future implementation will require quantifying their effect on ABV infection.

377 A randomized controlled clinical trial will evaluate the epidemiological impact of TIRS in Merida  
378 [39], with ABV infection in *Ae. aegypti* being quantified as a secondary endpoint. Our findings suggest  
379 that entomological collections with Prokopacks indoors should be conducted for more than 10 minutes  
380 per house. Increasing the collection effort will increase the probability of detecting ABV infected *Ae.*  
381 *aegypti*. In the context of the TIRS trial, obtaining accurate measures of ABV infection in *Ae. aegypti* will

382 lead to better estimates of the measured impact of the intervention, as it will allow quantifying what  
383 percent reduction in cases will be associated with a reduction in ABV infection in *Ae. aegypti* females. As  
384 other trials are implemented in the future, the consideration of the impact of an intervention on ABV  
385 infection in *Ae. aegypti* can be used to communicate vector control personnel the expected  
386 entomological effect of their actions. 

387           Assessments of arbovirus infection in mosquitoes are commonly expressed as the prevalence of  
388 infections in pools of 15 - 30 individuals [26]. While MIR or MLR are commonly calculated, these indexes  
389 are prone bias particularly if infection aggregates within a household [26, 31, 32]. As far as we know,  
390 there is no study in which ABV infection has been explored in individual field collected mosquitoes. The  
391 only report we found, also conducted in Mérida, used RNA extracted from individual females *Ae. aegypti*  
392 and tested for DENV infection by RT-PCR in pools of 10 extractions, with mosquitoes from positive pools  
393 further tested individually [29]. Such study, which occurred in periods of high and low DENV  
394 transmission, found natural infection rates of <1%. Our study found high prevalence of infection by  
395 CHIKV in *Ae. aegypti* mosquitoes in a period when the most reported infection in Merida was ZIKV (Sup.  
396 Fig 1). Considering that most ABV infections go undetected to the public health system, either as  
397 asymptomatic or subclinical infections or for mild illness, may help explain the mismatch between high  
398 CHIKV infection in mosquitoes and the focus on ZIKV testing during this period of virus introduction into  
399 Merida [14]. There are reports of early detection of CHIKV and ZIKV infection in *Ae. aegypti* from other  
400 states of Mexico prior to the detection of symptomatic cases [59, 60], which supports the known  
401 assumption that passive surveillance may fail to detect virus circulation in periods of low transmission.

402           We also found houses infested with mosquitoes positive for different viruses, suggesting the co-  
403 circulation of more than one virus within the area and even within the same house. CHIKV and ZIKV-  
404 positive mosquitoes were found in two houses, while CHIKV and DENV-positive specimens were

405 detected in one house. Additionally, coinfections of CHIKV and ZIKV was detected in three specimens  
406 within the same house. This data aligns with other studies that also reported the cohabitation of  
407 mosquitoes infected with different viruses within the same area or houses and the coinfection of two  
408 (or more) different viruses in individual mosquito. Cases of humans co-infected with multiple viruses  
409 have been reported in the Americas [61] and other regions [62-64]. Coinfections with all 3 arboviruses—  
410 CHIKV, DENV, and ZIKV—have also been reported [65, 66]. *Aedes aegypti* infected with more than one  
411 virus has also been detected, for example mosquitoes coinfecting with ZIKV and DENV were detected in  
412 Manaus, showing that ZIKV is preferentially transmitted over DENV when in coinfection [67]. Coinfection  
413 and transmission capacity of DENV/ CHIKV was also demonstrated through experimental infection of *Ae.*  
414 *aegypti* [68]. Notwithstanding, the epidemiological impact of multiple infections is unknown.

415 In order to accurately confirm the detected ABV infection, we sequenced every PCR-positive  
416 sample. Our sequence reads positively confirmed the PCR results. In the case of DENV, we were able to  
417 typify the viral serotype as DENV-4. This result lines up with previous results obtained from different  
418 work in the area where all four DENV serotypes were found circulating in Merida being DENV-4 the  
419 predominant in the most years with DENV-1 and DENV-3 [14, 69].

420 By individually testing mosquitoes, and individually testing body parts (head or abdomen) we  
421 unveiled important details about the process of infection and human-mosquito contacts in *Ae. aegypti*.  
422 The majority of recently blood fed females (Sella score 2) were positive for CHIKV (34.3%). We also  
423 detected 32 (19.3%) unfed (Sella score 1) infected females, which this could be interpreted as females  
424 that had blood fed and digested the blood ready for another gonotrophic cycle. Generally, a mosquito is  
425 considered to be infective when especially the head is positive, indicating the infection of the salivary  
426 glands by the virus and ready to be transmitted through the next blood meal. We found 38 female  
427 specimens with positive head, 86.8% of those were CHIKV-positive, and 5 specimens were head positive  
428 and unfed status, presumably infectives. Gravid females (Sella's score 7) with positive heads were also

429 detected (7 specimens). We used such information to innovatively calculate indices of transmission  
430 potential or risk (VC or EIR) not commonly estimated for ABVs. We found that transmission potential  
431 (VC) was sensitive to the total density of mosquitoes collected, whereas transmission risk (EIR) was  
432 sensitive to the detection of infected mosquitoes. Our analyses indicate that when *Ae. aegypti* total  
433 density is calculated, a significant association with two measures of ABV transmission exists. Such  
434 findings highlight the relevance of accurate estimates of vector density and infection rates and highlight  
435 the potential for metrics such as EIR or VC to be used as endpoints for the evaluation of the impact of  
436 vector control on ABVs. 

437

438



439 **Acknowledgements**

440 We thank the residents of Merida, Yucatan, for kindly allowing us to conduct this important  
441 research.

442 **Author contributions**

443 Conceptualization: GVP, PMS, GAT, ODK, NPR

444 Formal Analysis: ODK, GVP, GAT, DCE

445 Methodology: NPR, EKC, ACM, ACR, PGP, HPG, MWD

446 Project Administration: PMS, GVP

447 Manuscript preparation: ODK, GVP, PMS

448 Review & Editing All authors

449

450 **Funding Statement**

451 Research funding was provided by an Interagency Agreement between USAID and the US  
452 Centers for Disease Control and Prevention (CDC: OADS BAA 2016-N-17844; PI, Vazquez-  
453 Prokopec G.M.), by the Canadian Institutes of Health Research (CIHR) and IDRC (Preventing Zika  
454 disease with novel vector control approaches, Project 108412) by Fondo Mixto CONACyT  
455 (Mexico)-Gobierno del Estado de Yucatan (Project YUC-2017-03-01-556), the National Institutes  
456 of Health (NIH/NIAID: U01AI148069) and Emory University via the MP3 initiative (Vazquez-  
457 Prokopec, PI). The opinions expressed herein are those of the author(s) and do not necessarily  
458 reflect the views of Emory University or the U.S. Agency for International Development. The  
459 findings and conclusions in this paper are those of the authors and do not necessarily represent  
460 the official position of the Centers for Disease Control and Prevention.



462 **References**

- 463 1. Pistone T, Ezzedine K, Schuffenecker I, Receveur M-C, Malvy D. An imported case of Chikungunya  
464 fever from Madagascar: use of the sentinel traveller for detecting emerging arboviral infections in tropical  
465 and European countries. *Travel medicine and infectious disease*. 2009;7(1):52-4.
- 466 2. Dash A, Bhatia R, Sunyoto T, Mourya D. Emerging and re-emerging arboviral diseases in Southeast  
467 Asia. *Journal of vector borne diseases*. 2013;50(2):77.
- 468 3. Pavía-Ruz N, Contreras-Capetillo S, Valadéz-González N, Villegas-Chim J, Carcaño-Castillo R,  
469 Valencia-Pacheco G, et al. An Integrated Intervention Model for the Prevention of Zika and Other Aedes-  
470 Borne Diseases in Women and their Families in Mexico. *Current Topics in Zika: IntechOpen*; 2017.
- 471 4. Rojas DP, Barrera-Fuentes GA, Pavia-Ruz N, Salgado-Rodriguez M, Che-Mendoza A, Manrique-  
472 Saide P, et al. Epidemiology of dengue and other arboviruses in a cohort of school children and their  
473 families in Yucatan, Mexico: Baseline and first year follow-up. *PLoS neglected tropical diseases*.  
474 2018;12(11).
- 475 5. Aragão CF, Pinheiro VCS, Nunes Neto JP, Silva EVPd, Pereira GJG, Nascimento BLSd, et al. Natural  
476 Infection of *Aedes aegypti* by Chikungunya and Dengue type 2 Virus in a Transition Area of North-  
477 Northeast Brazil. *Viruses*. 2019;11(12):1126.
- 478 6. Zanotto PMdA, Leite LCdC. The challenges imposed by Dengue, Zika, and Chikungunya to Brazil.  
479 *Frontiers in immunology*. 2018;9:1964.
- 480 7. Dzul-Manzanilla F, Martinez NE, Cruz-Nolasco M, Gutierrez-Castro C, Lopez-Damian L, Ibarra-  
481 Lopez J, et al. Evidence of vertical transmission and co-circulation of chikungunya and dengue viruses in  
482 field populations of *Aedes aegypti* (L.) from Guerrero, Mexico. *Trans R Soc Trop Med Hyg*.  
483 2016;110(2):141-4. Epub 2015/12/30. doi: 10.1093/trstmh/trv106. PubMed PMID: 26711697.
- 484 8. Dos Reis IC, Gibson G, Ayllón T, de Medeiros Tavares A, de Araújo JMG, da Silva Monteiro E, et al.  
485 Entomo-virological surveillance strategy for dengue, Zika and chikungunya arboviruses in field-caught  
486 *Aedes* mosquitoes in an endemic urban area of the Northeast of Brazil. *Acta tropica*. 2019;197:105061.
- 487 9. Beltrán-Silva S, Chacón-Hernández S, Moreno-Palacios E, Pereyra-Molina J. Clinical and  
488 differential diagnosis: Dengue, chikungunya and Zika. *Revista Médica del Hospital General de México*.  
489 2018;81(3):146-53.
- 490 10. Shapiro-Mendoza CK, Rice ME, Galang RR, Fulton AC, VanMaldeghem K, Prado MV, et al.  
491 Pregnancy outcomes after maternal Zika virus infection during pregnancy—US Territories, January 1,  
492 2016–April 25, 2017. *MMWR Morbidity and mortality weekly report*. 2017;66(23):615.
- 493 11. Hawman DW, Stoermer KA, Montgomery SA, Pal P, Oko L, Diamond MS, et al. Chronic joint disease  
494 caused by persistent Chikungunya virus infection is controlled by the adaptive immune response. *Journal*  
495 *of virology*. 2013;87(24):13878-88.
- 496 12. Gu W, Unnasch TR, Katholi CR, Lampman R, Novak RJ. Fundamental issues in mosquito  
497 surveillance for arboviral transmission. *Transactions of the Royal Society of Tropical Medicine and*  
498 *Hygiene*. 2008;102(8):817-22.
- 499 13. Achee NL, Grieco JP, Vatandoost H, Seixas G, Pinto J, Ching-Ng L, et al. Alternative strategies for  
500 mosquito-borne arbovirus control. *PLoS neglected tropical diseases*. 2019;13(1).

- 501 14. Bisanzio D, Dzúl-Manzanilla F, Gomez-Dantés H, Pavia-Ruz N, Hladish TJ, Lenhart A, et al. Spatio-  
502 temporal coherence of dengue, chikungunya and Zika outbreaks in Merida, Mexico. *PLoS neglected*  
503 *tropical diseases*. 2018;12(3):e0006298.
- 504 15. Scott TW, Morrison AC. *Aedes aegypti* density and the risk of dengue-virus. *Ecological aspects for*  
505 *application of genetically modified mosquitoes*. 2003;2:187.
- 506 16. Bowman LR, Runge-Ranzinger S, McCall P. Assessing the relationship between vector indices and  
507 dengue transmission: a systematic review of the evidence. *PLoS neglected tropical diseases*. 2014;8(5).
- 508 17. Cromwell EA, Stoddard ST, Barker CM, Van Rie A, Messer WB, Meshnick SR, et al. The relationship  
509 between entomological indicators of *Aedes aegypti* abundance and dengue virus infection. *PLoS*  
510 *neglected tropical diseases*. 2017;11(3).
- 511 18. Koyoc-Cardena E, Medina-Barreiro A, Cohuo-Rodríguez A, Pavía-Ruz N, Lenhart A, Ayora-Talavera  
512 G, et al. Estimating absolute indoor density of *Aedes aegypti* using removal sampling. *Parasites & vectors*.  
513 2019;12(1):250.
- 514 19. Stoddard ST, Forshey BM, Morrison AC, Paz-Soldan VA, Vazquez-Prokopec GM, Astete H, et al.  
515 House-to-house human movement drives dengue virus transmission. *Proceedings of the National*  
516 *Academy of Sciences*. 2013;110(3):994-9.
- 517 20. Vazquez-Prokopec GM, Medina-Barreiro A, Che-Mendoza A, Dzúl-Manzanilla F, Correa-Morales  
518 F, Guillermo-May G, et al. Deltamethrin resistance in *Aedes aegypti* results in treatment failure in Merida,  
519 Mexico. *PLoS neglected tropical diseases*. 2017;11(6):e0005656.
- 520 21. Reiner RC, Stoddard ST, Forshey BM, King AA, Ellis AM, Lloyd AL, et al. Time-varying, serotype-  
521 specific force of infection of dengue virus. *Proceedings of the National Academy of Sciences*.  
522 2014;111(26):E2694-E702.
- 523 22. Overgaard HJ, Pientong C, Thaewngiew K, Bangs MJ, Ekalaksananan T, Aromseree S, et al.  
524 Assessing dengue transmission risk and a vector control intervention using entomological and  
525 immunological indices in Thailand: study protocol for a cluster-randomized controlled trial. *Trials*.  
526 2018;19(1):122.
- 527 23. Barrera R, Amador M, Acevedo V, Beltran M, Munoz J. A comparison of mosquito densities,  
528 weather and infection rates of *Aedes aegypti* during the first epidemics of Chikungunya (2014) and Zika  
529 (2016) in areas with and without vector control in Puerto Rico. *Medical and veterinary entomology*.  
530 2019;33(1):68-77.
- 531 24. Kuno G. Factors influencing the transmission of dengue viruses. *Dengue and dengue hemorrhagic*  
532 *fever*. 1997;1:23-39.
- 533 25. Scott TW, Morrison AC. Vector dynamics and transmission of dengue virus: implications for  
534 dengue surveillance and prevention strategies. *Dengue virus*: Springer; 2010. p. 115-28.
- 535 26. Bustamante DM, Lord CC. Sources of error in the estimation of mosquito infection rates used to  
536 assess risk of arbovirus transmission. *The American journal of tropical medicine and hygiene*.  
537 2010;82(6):1172-84.
- 538 27. Gordon SW, Tammariello RF, Linthicum KJ, Dohm DJ, Digoutte J, Calvo-Wilson M. Arbovirus  
539 isolations from mosquitoes collected during 1988 in the Senegal River basin. *The American journal of*  
540 *tropical medicine and hygiene*. 1992;47(6):742-8.

- 541 28. Faye O, Faye O, Diallo D, Diallo M, Weidmann M. Quantitative real-time PCR detection of Zika  
542 virus and evaluation with field-caught mosquitoes. *Virology journal*. 2013;10(1):311.
- 543 29. Loroño-Pino MA, García-Rejón JE, Machain-Williams C, Gomez-Carro S, Nuñez-Ayala G, del  
544 Rosario Nájera-Vázquez M, et al. Towards a Casa Segura: a consumer product study of the effect of  
545 insecticide-treated curtains on *Aedes aegypti* and dengue virus infections in the home. *The American*  
546 *journal of tropical medicine and hygiene*. 2013;89(2):385-97.
- 547 30. Coffey LL, Page BL, Greninger AL, Herring BL, Russell RC, Doggett SL, et al. Enhanced arbovirus  
548 surveillance with deep sequencing: Identification of novel rhabdoviruses and bunyaviruses in Australian  
549 mosquitoes. *Virology*. 2014;448:146-58.
- 550 31. CHIANI I, Reeves WC. Statistical estimation of virus infection rates in mosquito vector  
551 populations. *American Journal of Hygiene*. 1962;75(3).
- 552 32. Gu W, Lampman R, Novak RJ. Problems in estimating mosquito infection rates using minimum  
553 infection rate. *Journal of medical entomology*. 2003;40(5):595-6.
- 554 33. Gu W, Lampman R, Novak R. Assessment of arbovirus vector infection rates using variable size  
555 pooling. *Medical and veterinary entomology*. 2004;18(2):200-4.
- 556 34. Anders KL, Le Hong Nga NTV, Thuy TVN, Tam CT, Tai LTH, Truong NT, et al. Households as foci for  
557 dengue transmission in highly urban Vietnam. *PLoS neglected tropical diseases*. 2015;9(2).
- 558 35. Dzul-Manzanilla F, Martínez NE, Cruz-Nolasco M, Gutiérrez-Castro C, López-Damián L, Ibarra-  
559 López J, et al. Arbovirus surveillance and first report of chikungunya virus in wild populations of *Aedes*  
560 *aegypti* from Guerrero, Mexico. *Journal of the American Mosquito Control Association*. 2015;31(3):275-7.
- 561 36. Silver JB. *Mosquito ecology: field sampling methods*: springer science & business media; 2007.
- 562 37. Vazquez-Prokopec GM, Galvin WA, Kelly R, Kitron U. A new, cost-effective, battery-powered  
563 aspirator for adult mosquito collections. *Journal of medical entomology*. 2009;46(6):1256-9.
- 564 38. Reiner Jr RC, Achee N, Barrera R, Burkot TR, Chadee DD, Devine GJ, et al. Quantifying the  
565 epidemiological impact of vector control on dengue. *PLoS neglected tropical diseases*.  
566 2016;10(5):e0004588.
- 567 39. Clinical Trials. NIH - U.S. National Library of Medicine. Impact of Indoor Residual Spraying on  
568 Aedes-borne Diseases 2020 [cited 2020 10 July]. Available from:  
569 <https://www.clinicaltrials.gov/ct2/show/NCT04343521>.
- 570 40. Pavia-Ruz N, Barrera-Fuentes GA, Villanueva-Jorge S, Che-Mendoza A, Campuzano-Rincón JC,  
571 Manrique-Saide P, et al. Dengue seroprevalence in a cohort of schoolchildren and their siblings in Yucatan,  
572 Mexico (2015-2016). *PLoS neglected tropical diseases*. 2018;12(11).
- 573 41. Detinova TS, Bertram D, Organization WH. Age-grouping methods in Diptera of medical  
574 importance, with special reference to some vectors of malaria: World Health Organization; 1962.
- 575 42. Santos CS, Pie MR, da Rocha TC, Navarro-Silva MA. Molecular identification of blood meals in  
576 mosquitoes (Diptera, Culicidae) in urban and forested habitats in southern Brazil. *PloS one*. 2019;14(2).
- 577 43. Lanciotti RS, Kosoy OL, Laven JJ, Panella AJ, Velez JO, Lambert AJ, et al. Chikungunya virus in US  
578 travelers returning from India, 2006. *Emerging infectious diseases*. 2007;13(5):764.

- 579 44. Lanciotti RS, Kosoy OL, Laven JJ, Velez JO, Lambert AJ, Johnson AJ, et al. Genetic and serologic  
580 properties of Zika virus associated with an epidemic, Yap State, Micronesia, 2007. *Emerging infectious*  
581 *diseases*. 2008;14(8):1232.
- 582 45. Kearse M, Moir R, Wilson A, Stones-Havas S, Cheung M, Sturrock S, et al. Geneious Basic: an  
583 integrated and extendable desktop software platform for the organization and analysis of sequence data.  
584 *Bioinformatics*. 2012;28(12):1647-9.
- 585 46. Burnham KP, Anderson DR. A practical information-theoretic approach. Model selection and  
586 multimodel inference, 2nd ed Springer, New York. 2002.
- 587 47. Smith D, Dushoff J, Snow R, Hay S. The entomological inoculation rate and *Plasmodium falciparum*  
588 infection in African children. *Nature*. 2005;438(7067):492-5.
- 589 48. McMillan JR, Blakney RA, Mead DG, Koval WT, Coker SM, Waller LA, et al. Linking the vectorial  
590 capacity of multiple vectors to observed patterns of West Nile virus transmission. *Journal of Applied*  
591 *Ecology*. 2019;56(4):956-65.
- 592 49. Gu W, Novak RJ. Detection probability of arbovirus infection in mosquito populations. *The*  
593 *American journal of tropical medicine and hygiene*. 2004;71(5):636-8.
- 594 50. Scott TW, Morrison AC, Lorenz LH, Clark GG, Strickman D, Kittayapong P, et al. Longitudinal studies  
595 of *Aedes aegypti* (Diptera: Culicidae) in Thailand and Puerto Rico: population dynamics. *Journal of medical*  
596 *entomology*. 2000;37(1):77-88.
- 597 51. De Benedictis J, Chow-Shaffer E, Costero A, Clark GG, Edman JD, Scott TW. Identification of the  
598 people from whom engorged *Aedes aegypti* took blood meals in Florida, Puerto Rico, using polymerase  
599 chain reaction-based DNA profiling. *The American journal of tropical medicine and hygiene*.  
600 2003;68(4):437-46.
- 601 52. Harrington LC, Fleisher A, Ruiz-Moreno D, Vermeylen F, Wa CV, Poulson RL, et al. Heterogeneous  
602 feeding patterns of the dengue vector, *Aedes aegypti*, on individual human hosts in rural Thailand. *PLoS*  
603 *Negl Trop Dis*. 2014;8(8):e3048.
- 604 53. Liebman KA, Stoddard ST, Reiner Jr RC, Perkins TA, Astete H, Sihuincha M, et al. Determinants of  
605 heterogeneous blood feeding patterns by *Aedes aegypti* in Iquitos, Peru. *PLoS Negl Trop Dis*.  
606 2014;8(2):e2702.
- 607 54. Schaber KL, Paz-Soldan VA, Morrison AC, Elson WH, Rothman AL, Mores CN, et al. Dengue illness  
608 impacts daily human mobility patterns in Iquitos, Peru. *PLoS neglected tropical diseases*.  
609 2019;13(9):e0007756.
- 610 55. Vazquez-Prokopec GM, Montgomery BL, Horne P, Clennon JA, Ritchie SA. Combining contact  
611 tracing with targeted indoor residual spraying significantly reduces dengue transmission. *Science*  
612 *advances*. 2017;3(2):e1602024.
- 613 56. Hladish TJ, Pearson CA, Toh KB, Rojas DP, Manrique-Saide P, Vazquez-Prokopec GM, et al.  
614 Designing effective control of dengue with combined interventions. *Proceedings of the National Academy*  
615 *of Sciences*. 2020;117(6):3319-25.
- 616 57. Flores HA, O'Neill SL. Controlling vector-borne diseases by releasing modified mosquitoes. *Nature*  
617 *Reviews Microbiology*. 2018;16(8):508-18.

- 618 58. Achee NL, Bangs MJ, Farlow R, Killeen GF, Lindsay S, Logan JG, et al. Spatial repellents: from  
619 discovery and development to evidence-based validation. *Malaria Journal*. 2012;11(1):164.
- 620 59. Dzul-Manzanilla F, Martínez NE, Cruz-Nolasco M, Gutiérrez-Castro C, López-Damián L, Ibarra-  
621 López J, et al. Evidence of vertical transmission and co-circulation of chikungunya and dengue viruses in  
622 field populations of *Aedes aegypti* (L.) from Guerrero, Mexico. *Transactions of the Royal Society of Tropical  
623 Medicine and Hygiene*. 2016;110(2):141-4.
- 624 60. Díaz-Quiñonez JA, López-Martínez I, Torres-Longoria B, Vázquez-Pichardo M, Cruz-Ramírez E,  
625 Ramírez-González JE, et al. Evidence of the presence of the Zika virus in Mexico since early 2015. *Virus  
626 Genes*. 2016;52(6):855-7.
- 627 61. Zambrano H, Waggoner JJ, Almeida C, Rivera L, Benjamin JQ, Pinsky BA. Zika virus and chikungunya  
628 virus coinfections: a series of three cases from a single center in Ecuador. *The American journal of tropical  
629 medicine and hygiene*. 2016;95(4):894-6.
- 630 62. Dupont-Rouzeyrol M, O'Connor O, Calvez E, Daures M, John M, Grangeon J-P, et al. Co-infection  
631 with Zika and dengue viruses in 2 patients, New Caledonia, 2014. *Emerging infectious diseases*.  
632 2015;21(2):381.
- 633 63. Iovine NM, Lednicky J, Cherabuddi K, Crooke H, White SK, Loeb JC, et al. Coinfection with Zika and  
634 dengue-2 viruses in a traveler returning from Haiti, 2016: clinical presentation and genetic analysis. *Clinical  
635 Infectious Diseases*. 2016:ciw667.
- 636 64. Furuya-Kanamori L, Liang S, Milinovich G, Magalhaes RJS, Clements AC, Hu W, et al. Co-  
637 distribution and co-infection of chikungunya and dengue viruses. *BMC infectious diseases*. 2016;16(1):84.
- 638 65. Villamil-Gómez WE, Rodríguez-Morales AJ, Uribe-García AM, González-Arismendy E, Castellanos  
639 JE, Calvo EP, et al. Zika, dengue, and chikungunya co-infection in a pregnant woman from Colombia.  
640 *International Journal of Infectious Diseases*. 2016;51:135-8.
- 641 66. Waggoner JJ, Gresh L, Vargas MJ, Ballesteros G, Tellez Y, Soda KJ, et al. Viremia and clinical  
642 presentation in Nicaraguan patients infected with Zika virus, chikungunya virus, and dengue virus. *Clinical  
643 Infectious Diseases*. 2016:ciw589.
- 644 67. Chaves BA, Orfano AS, Nogueira PM, Rodrigues NB, Campolina TB, Nacif-Pimenta R, et al.  
645 Coinfection with Zika Virus (ZIKV) and Dengue Virus Results in Preferential ZIKV Transmission by Vector  
646 Bite to Vertebrate Host. *The Journal of Infectious Diseases*. 2018;218(4):563-71. doi:  
647 10.1093/infdis/jiy196.
- 648 68. Nuckols J, Huang Y-J, Higgs S, Miller A, Pyles R, Spratt Hm, et al. Evaluation of simultaneous  
649 transmission of chikungunya virus and dengue virus type 2 in infected *Aedes aegypti* and *Aedes albopictus*  
650 (Diptera: Culicidae). *Journal of medical entomology*. 2015;52(3):447-51.
- 651 69. Pavía-Ruz N, Barrera-Fuentes GA, Villanueva-Jorge S, Che-Mendoza A, Campuzano-Rincón JC,  
652 Manrique-Saide P, et al. Dengue seroprevalence in a cohort of schoolchildren and their siblings in Yucatan,  
653 Mexico (2015-2016). *PLoS neglected tropical diseases*. 2018;12(11):e0006748.
- 654 70. Méndez N, Baeza-Herrera L, Ojeda-Baranda R, Huchim-Lara O, Gómez-Carro S. Perfil  
655 clinicoepidemiológico de la infección por Chikungunya en casos hospitalarios atendidos en 2015 en  
656 Mérida, México. *Revista Panamericana de Salud Pública*. 2017;41:e91.

657

658 **Table 1.** Descriptive measures and Infection rates in indoor resting *Ae. aegypti* mosquitoes from  
 659 Yucatan, Mexico.

|                                                                                                                                |               |
|--------------------------------------------------------------------------------------------------------------------------------|---------------|
| # of houses screened for <i>Ae. aegypti</i>                                                                                    | 200           |
| # of infested houses with <i>Ae. aegypti</i>  | 179 (89.5%)   |
| # of infested houses with <i>Ae. aegypti</i> females                                                                           | 169 (94.4%)   |
| Total # of <i>Ae. aegypti</i>                                                                                                  | 3,439         |
| # of <i>Ae. aegypti</i> females                                                                                                | 2,161 (62.8%) |
| # of <i>Ae. aegypti</i> males                                                                                                  | 1,278 (37.2%) |
| Sex ratio F:M                                                                                                                  | 1.7:1         |
| <hr/>                                                                                                                          |               |
| # of positive <i>Ae. aegypti</i> females for any virus                                                                         | 166 (7.7%)    |
| # of positive <i>Ae. aegypti</i> females  KV | 129 (77.7%)   |
| # of positive <i>Ae. aegypti</i> females DENV                                                                                  | 19 (11.4%)    |
| # of positive <i>Ae. aegypti</i> females ZIKV                                                                                  | 15 (9.0%)     |
| # of positive <i>Ae. aegypti</i> females with coinfection CHIKV - ZIKV                                                         | 3 (1.8%)      |
| <hr/>                                                                                                                          |               |
| # of houses with positive <i>A. aegypti</i> females (+) for any virus                                                          | 43 (25.4%)    |
| # of houses (+) CHIKV                                                                                                          | 16 (37.2%)    |
| # of houses (+) DENV                                                                                                           | 12 (27.9%)    |
| # of houses (+) ZIKV                                                                                                           | 11 (25.6%)    |
| # of houses (+) CHIV + ZIKV                                                                                                    | 1 (2.3%)      |
| # of houses (+) CHIKV + DENV                                                                                                   | 2 (4.6%)      |
| # of houses (+) with mosquito coinfection (CHIKV/ZIKV)                                                                         | 1 (2.3%)      |

660

661



662 **Table 2** - Number of anatomical structures of *Ae. aegypti* mosquitoes infected with either virus collected  
663 in Yucatan, Mexico. Percentages indicate the fraction of infection with each virus for each anatomical  
664 structure.

665

| 666 | <b>Structure</b> | <b>DENV</b> | <b>CHIKV</b> | <b>ZIKV</b> | <b>CHIKV/ZIKV<br/>coinfection</b> |
|-----|------------------|-------------|--------------|-------------|-----------------------------------|
| 667 | <b>Head</b>      | 1 (2.6%)    | 33 (86.8%)   | 1 (2.6%)    | 3 (7.9%)                          |
| 668 | <b>Body</b>      | 18 (13.7%)  | 96 (73.3%)   | 14 (10.7%)  | 3 (2.3%)                          |

669

670

671 **Table 3** – Distribution of virus infection among Sella scores, and their relationship with positive heads  
 672 from *Ae. aegypti* collected from Yucatan, Mexico.

| Sella score | CHIKV       | DENV       | ZIKV      | CHIKV/ZIKV | Total             | Heads +    |
|-------------|-------------|------------|-----------|------------|-------------------|------------|
| 0           | 1 (0.6%)    | 0 (0.00%)  | 0 (0.00%) | 0 (0.00%)  | 1 (0.60%)         | 1 (0.60%)  |
| 1           | 27 (16.3%)  | 2 (1.2%)   | 3 (1.8%)  | 0 (0.0%)   | 32 (19.3%)        | 5 (3.0%)   |
| 2           | 47 (28.3%)  | 6 (3.6%)   | 4 (2.4%)  | 0 (0.0%)   | <b>57 (34.3%)</b> | 12 (7.2%)  |
| 3           | 8 (4.8%)    | 5 (3.0%)   | 1 (0.6%)  | 0 (0.0%)   | 14 (8.4%)         | 3 (1.8%)   |
| 4           | 10 (6.0%)   | 0 (0.0%)   | 2 (1.2%)  | 2 (1.2%)   | 14 (8.4%)         | 4 (2.4%)   |
| 5           | 8 (4.8%)    | 2 (1.2%)   | 0 (0.0%)  | 0 (0.0%)   | 10 (6.0%)         | 1 (0.6%)   |
| 6           | 14 (8.4%)   | 2 (1.2%)   | 0 (0.0%)  | 0 (0.0%)   | 16 (9.6%)         | 5 (3.0%)   |
| 7           | 14 (8.4%)   | 2 (1.2%)   | 5 (3.0%)  | 1 (0.6%)   | 22 (13.2%)        | 7 (4.2%)   |
| Total       | 129 (77.7%) | 19 (11.4%) | 15 (9.0%) | 3 (1.8%)   | 166 (100%)        | 38 (23.0%) |

673

674

675

676

677

678

679

680

681 **Fig. 1** – Distribution of the number of female *Ae. aegypti* positive for CHIKV, DENV and ZIKV per house  
682 with positive mosquitoes from Yucatan, Mexico.

683

684

685

686

687

688

689

690

691

692

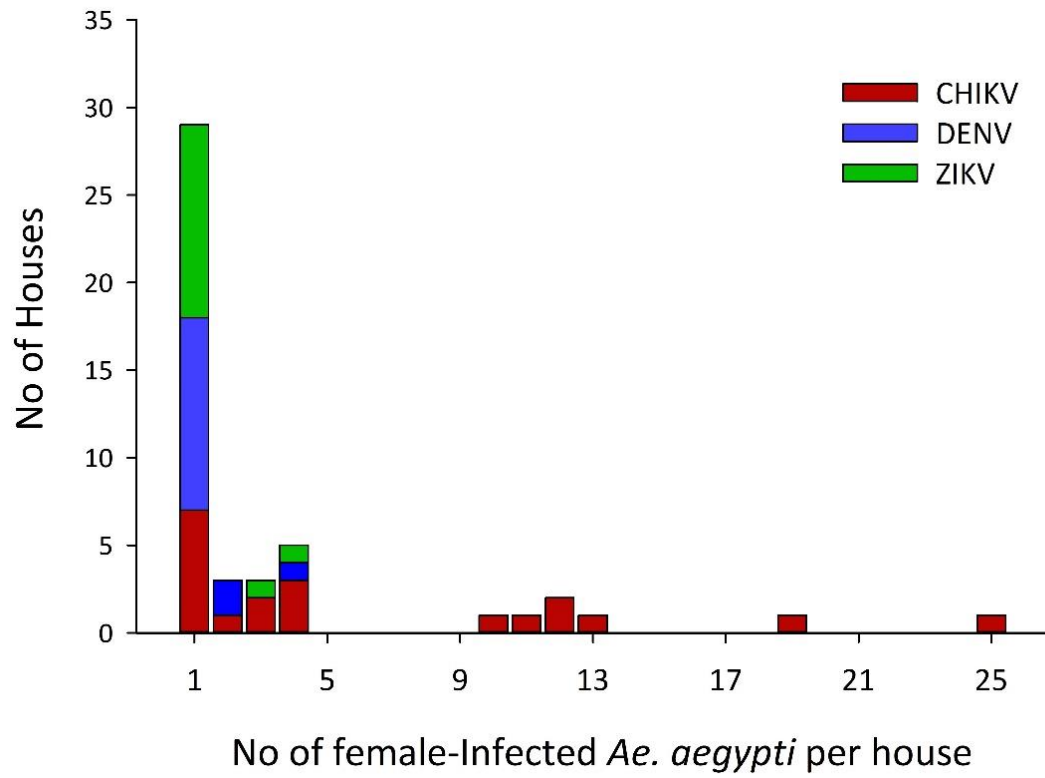

693 **Fig. 2.** Percentage of houses infested with female *Ae. aegypti* positive for any of the three targeted viruses  
 694 in low-density (<10 total mosquitos per house, n=98) and high-density (> 10 total mosquitoes per house,  
 695 n=70) premises. Panel A shows houses with positive bodies and heads and panel B shows the percentage  
 696 of houses where only heads were positive. The variable co-occurrence contains percentages of houses  
 697 where mosquitoes where positive for either virus within the same house, including 3 positive mosquitoes  
 698 with coinfection between CHIKV and ZIKV.

699

700

701

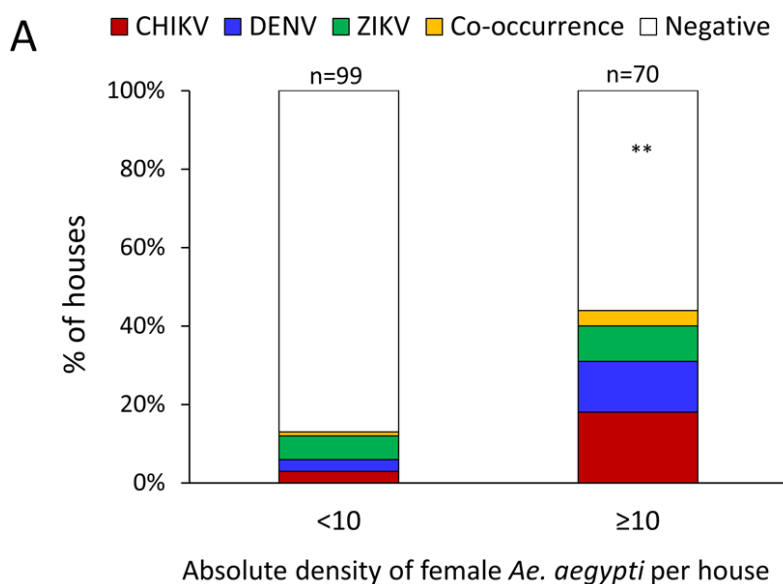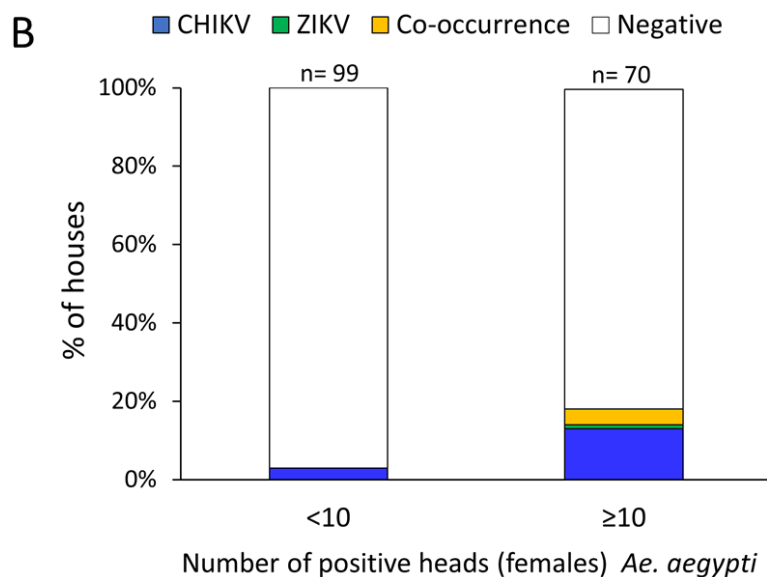

702 **Fig. 3.** Probability of detecting an infected female *Ae. aegypti* as a function of the total *Ae. aegypti* catch  
703 per house with evidence of recent arbovirus human infection. Solid line represents the mean prediction  
704 from a binomial generalized linear mixed effects model and gray band the 95% CI of the prediction.

705

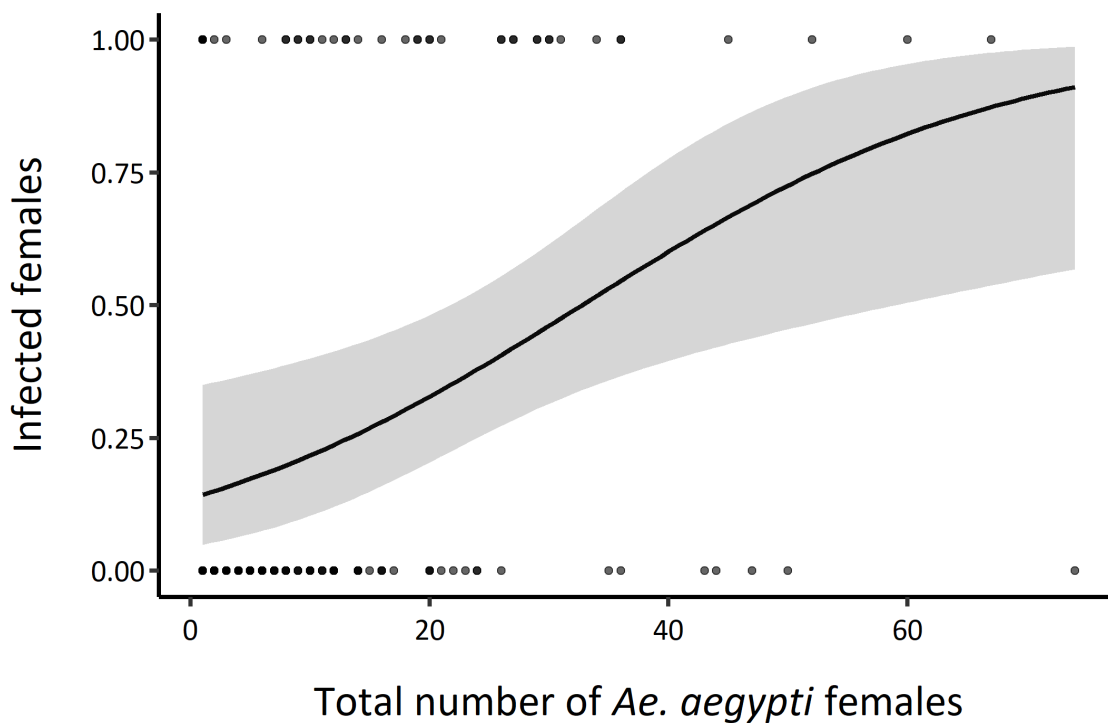

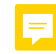

706 **Fig. 4** – Cumulative probability of detecting houses with positive female *Ae. aegypti* (body and head) (A) and  
707 cumulative probability of detecting positive female *Ae. aegypti* (body and head) (B) for Chikungunya (CHIKV), Dengue  
708 (DENV) and/or Zika (ZIKV) in house as the collection effort increases in 10-min intervals.

709

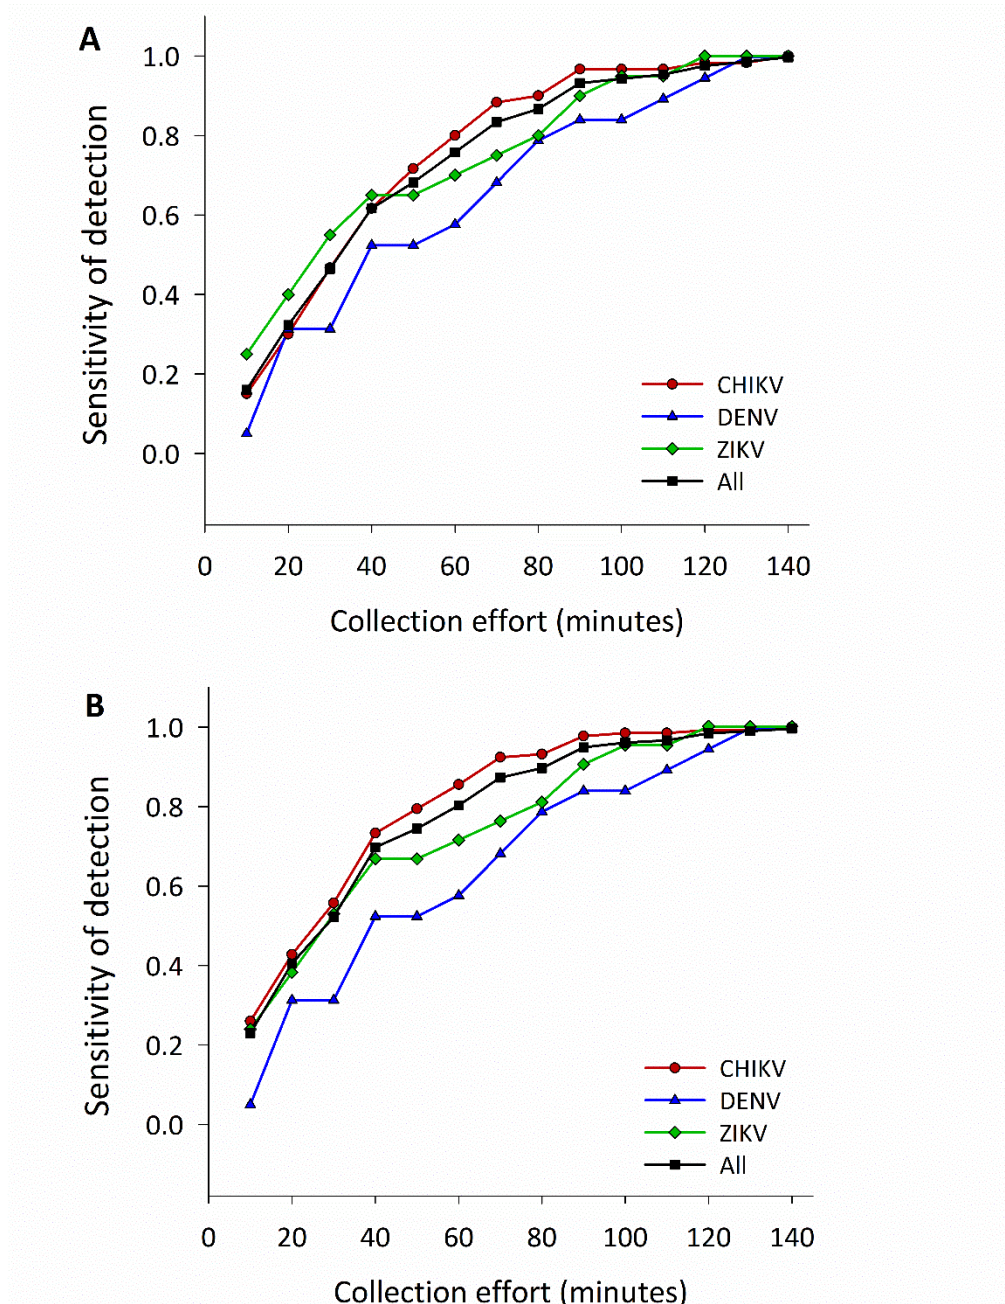

710 **Fig. 5 - Household-level estimates of ABV transmission potential.** The proportion of vectors per host  
711 ( $m$ ), entomologic inoculation rate (EIR) and vectorial capacity (VC) were calculated per house and used  
712 to compare estimated between sample and total *Ae. aegypti* collections (panels A, C, E). Panels B, D and  
713 F show the association between total *Ae. aegypti* female abundance per house, and estimates of  $m$ , EIR  
714 and VC, respectively. Lines show the fit and confidence interval of a generalized-linear mixed model  
715 fitted to the data (Table S3).

716

717

718

719

720

721

722

723

724

725

726

727

728

729

730

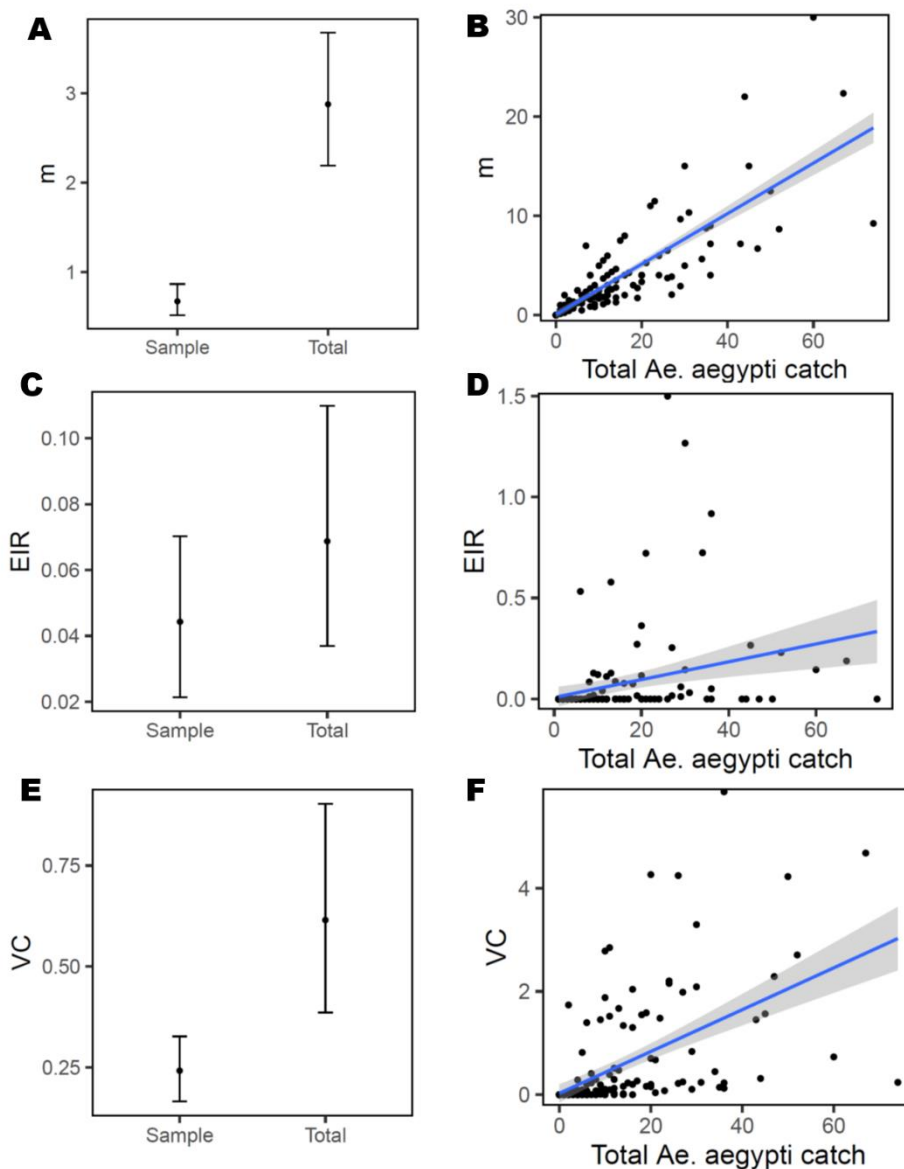

731 **Supporting Information**

732 **Table S1** - Description and characteristics of real-time RT-PCR primer/probe sets used to target CHIK,  
 733 ZIKV and DENV virus

734

| Primer     | Sequence                        | Probe                   | Working Concentration (μM) |
|------------|---------------------------------|-------------------------|----------------------------|
| panDENf    | AAGGACTAGAGGTTAKAGGAGACCC       |                         | 25                         |
| panDENr    | CGYTCTGTGCCTGGAWTGATG           | Quasar670<br>(Cy5)-BHQ2 | 25                         |
| panDENp    | AACAGCATATTGACGCTGGGAIAGACCAG   |                         | 10                         |
| CHIKf6856  | TCACTCCCTGTTGGACTTGATAGA        |                         | 25                         |
| CHIKr 6981 | TTGACGAACAGAGTTAGGAACATACC      | TAMRA-<br>BHQ2          | 25                         |
| CHIKp 6919 | AGGTACGCGCTTCAAGTTCGGCG         |                         | 10                         |
| Zika1087f  | CCGCTGCCCAACAACAAG              |                         | 25                         |
| Zika1163cr | CCACTAACGTTCTTTTGACAGACAT       | FAM-BHQ1                | 25                         |
| Zika1108p  | AGCCTACCTTGACAAGCAGTCAGACACTCAA |                         | 10                         |

735

736

737



738 **Table S2.** Odd-ratio and 95% CI of the relationship between Sella scores and positive heads or positive  
 739 bodies in *Ae. aegypti* collected from Yucatan, Mexico. No statistically significance was detected.

740

|                | Infection in Bodies |      |       | Infection in Heads |       |        |
|----------------|---------------------|------|-------|--------------------|-------|--------|
|                | OR                  | 2.5% | 97.5% | OR                 | 2.50% | 97.50% |
| <b>Sella 1</b> | 0.0                 | 0.0  | 0.0   | 0.0                | 0.0   | 0.0    |
| <b>Sella 2</b> | 1.3                 | 0.7  | 2.5   | 1.5                | 0.5   | 4.4    |
| <b>Sella 3</b> | 2.2                 | 1.0  | 5.4   | 1.6                | 0.4   | 6.4    |
| <b>Sella 4</b> | 1.1                 | 0.5  | 2.5   | 0.8                | 1.0   | 3.7    |
| <b>Sella 5</b> | 1.3                 | 0.5  | 3.5   | 0.6                | 0.1   | 6.1    |
| <b>Sella 6</b> | 1.0                 | 0.4  | 2.4   | 1.2                | 0.3   | 4.9    |
| <b>Sella 7</b> | 0.8                 | 0.9  | 1.8   | 0.7                | 0.9   | 2.5    |

741 **Table S3** - Model fits for the association between entomologic inoculation rate (**EIR**) or vectorial capacity  
742 (**VR**) and total catch of female *Ae. aegypti* indoors.

743

---

| <b>Model</b>           | <b>Parameter</b> | <b>Estimate</b> | <b>SE</b> | <b>t</b> | <b>P</b> |
|------------------------|------------------|-----------------|-----------|----------|----------|
| <b>EIR~Total catch</b> | Intercept        | 0.0379          | 0.0232    | 1.629    | 0.106    |
|                        | Total catch      | 0.0020          | 0.0009    | 2.181    | 0.031    |
| <b>VC~Total catch</b>  | Intercept        | -0.3323         | 0.1050    | -3.166   | 0.001    |
|                        | Total catch      | 0.0744          | 0.0046    | 16.155   | < 2e-16  |

---

744

745

746

747

748

749

750

751

752

753

754

755

756 **Table S4.** List of arbovirus-positive sequences that were used to confirm infection in collected  
 757 mosquitoes from Yucatan, Mexico.

| Virus             | Samples Pos | Seq Samples | Blast Samples |                   |
|-------------------|-------------|-------------|---------------|-------------------|
| CHIKV             | 129         | 100         | 92            | 76 Consensus      |
|                   |             |             |               | 16 Singlets       |
| DENV <sup>^</sup> | 19          | 17          | 12            | 3 Consensus       |
|                   |             |             |               | 9 Singlets post t |
| ZIKV              | 18          | 17          | 17            | 7 Consensus       |
|                   |             |             |               | 10 Singlets       |
|                   | -->         | 7 heads*    | 7             | 5 Consensus       |
|                   |             |             |               | 2 Singlets        |
| -->               | 3 co-CHIKV  | 3           | 3 Consensus   |                   |

758

\* ZIKV heads matches with positive bodies.

759

<sup>^</sup> DENV serotype corresponded to DENV-4

760

761 **Fig. S1** – Number of clinical confirmed cases between 2015 and 2018 in Merida, Yucatan. Mexico. Data  
762 was obtained from SINAVE database, number of cases caused by CHIKV in 2015 was obtained from  
763 Mendes et al. 2018 [70]. Axis Y (Number of confirmed cases) is presented in Logarithmic scale.

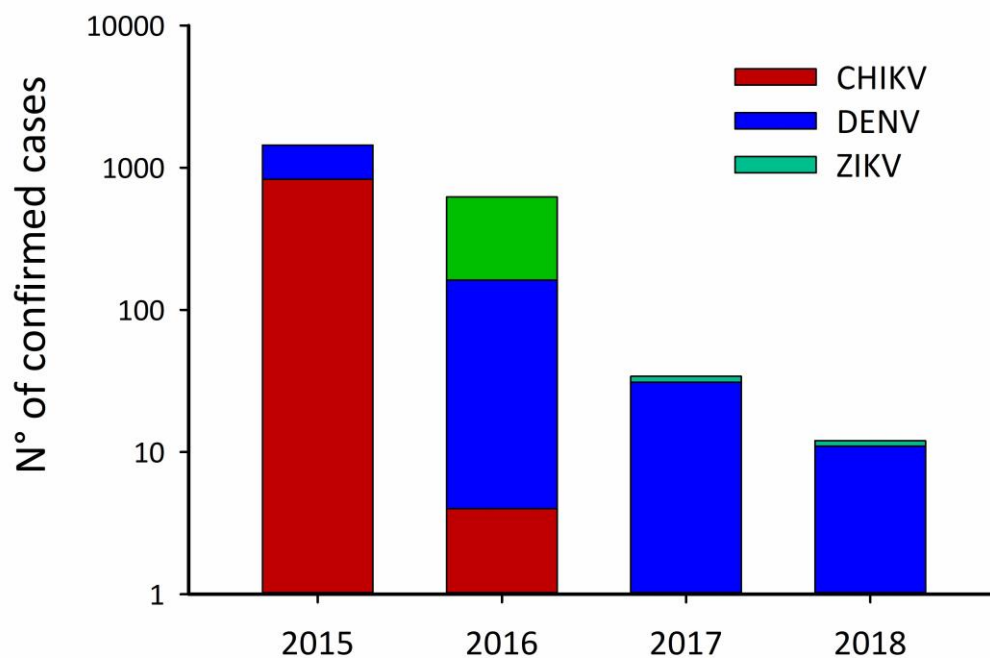

780 **Fig. S2** - Distribution of human biting rate ( $a$ ) by house.

781

782

783

784

785

786

787

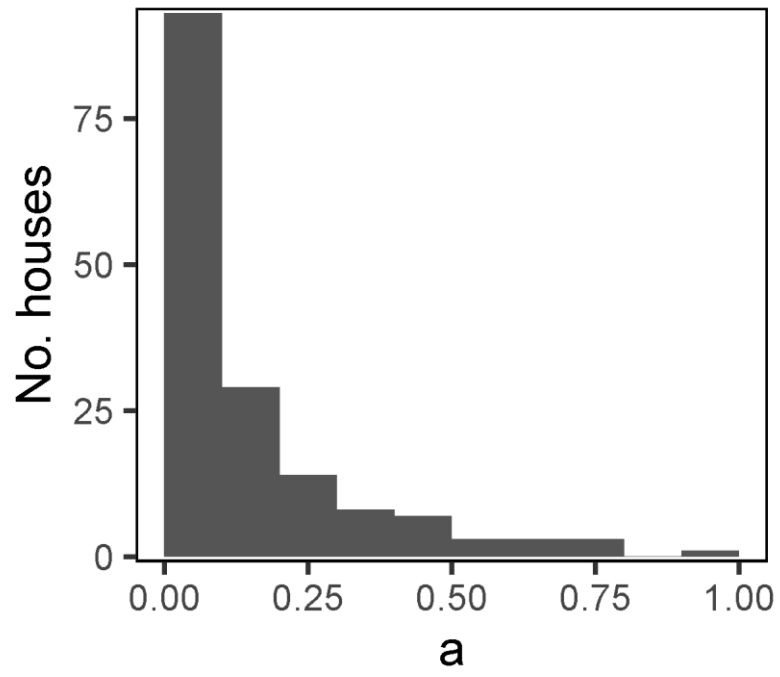

Supplement: pntd.0008972.s008.pdf [file pntd.0008972.s008.pdf]
